# Supplementary material
Source: PubMed Central journal article supplement (PMC3725307)
Supplement: NIHMS477229-supplement-1.pdf [file NIHMS477229-supplement-1.pdf]

## **SUPPLEMENTAL MATERIAL**

Table S1. ICD-9 code definitions

| <b>Diagnosis/procedure</b>    | <b>ICD-9-CM diagnosis codes</b>                                                                                              | <b>ICD-9-CM volume 3 procedure codes</b> |
|-------------------------------|------------------------------------------------------------------------------------------------------------------------------|------------------------------------------|
| Acute Ischemic stroke         | 433.01, 433.11, 433.21, 433.31, 433.81, 433.91, 434.01, 434.91, 436                                                          |                                          |
| Thrombolytic infusion         |                                                                                                                              | 99.10                                    |
| Endovascular stroke treatment |                                                                                                                              | 88.41, 39.74                             |
| ICH                           | 431                                                                                                                          |                                          |
| GI bleeding                   | 578, 578.0, 578.1, 578.9                                                                                                     |                                          |
| Gastrostomy                   |                                                                                                                              | 43.11, 43.19                             |
| Tracheostomy                  |                                                                                                                              | 31.1, 31.2, 32.21, 32.29                 |
| Atrial fibrillation           | 427.31                                                                                                                       |                                          |
| Acute kidney failure          | 584.xx                                                                                                                       |                                          |
| Acute myocardial infarction   | 410.xx                                                                                                                       |                                          |
| Acute respiratory failure     | 518.81                                                                                                                       |                                          |
| Cardiac arrest                | 427.5                                                                                                                        |                                          |
| Deep venous thrombosis        | 453.2, 453.4, 453.40, 453.41, 453.42, 453.82, 453.83, 453.84, 453.85, 453.86, 453.87, 453.88, 453.89                         |                                          |
| Dyslipidemia                  | 272.0, 272.1, 272.2, 272.3, 272.4                                                                                            |                                          |
| Pneumonia                     | 480.x, 481, 482.x, 483.x, 484.x, 485, 486                                                                                    |                                          |
| Pulmonary embolism            | 415.1, 415.11, 415.19                                                                                                        |                                          |
| Sepsis                        | 995.91, 995.92, 996.64, 038, 790.7, 785.52                                                                                   |                                          |
| Urinary tract infection       | 599.0                                                                                                                        |                                          |
| Dialysis                      | V45.1, V45.11, V45.12, V56, V56.0, V56.1, V56.2, V56.3, V56.31, V56.32, V56.8, E87.91, 996.1, 996.68, 996.68, 996.56, 996.73 | 39.95, 54.98, 38.95                      |

Table S2: Comparison of cases with unknown thrombolysis day (excluded from the study) and known thrombolysis day (screened for eligibility)

|                                                  | Thrombolysis<br>day unknown*<br>(n= 2,057) | Thrombolysis<br>day known<br>(n= 12,991) | P value<br>(Chi-square<br>test) |
|--------------------------------------------------|--------------------------------------------|------------------------------------------|---------------------------------|
| <b>Age, years</b>                                |                                            |                                          | <0.001                          |
| ≤18                                              | 0.3%                                       | 0.2%                                     |                                 |
| 19-64                                            | 39.2%                                      | 37.4%                                    |                                 |
| 65-79                                            | 37.7%                                      | 35.1%                                    |                                 |
| ≥80                                              | 22.8%                                      | 27.4%                                    |                                 |
| <b>Female gender</b>                             | 48.6%                                      | 49.2%                                    | 0.608                           |
| <b>Ethnicity</b>                                 |                                            |                                          | <0.001                          |
| Caucasian                                        | 31.5%                                      | 64.0%                                    |                                 |
| African-American                                 | 6.0%                                       | 12.8%                                    |                                 |
| Hispanic                                         | 1.2%                                       | 6.0%                                     |                                 |
| Other                                            | 1.9%                                       | 5.0%                                     |                                 |
| Missing information                              | 59.5%                                      | 12.3%                                    |                                 |
| <b>Health insurance</b>                          |                                            |                                          | 0.445                           |
| Medicare                                         | 57.8%                                      | 58.5%                                    |                                 |
| Medicaid                                         | 7.7%                                       | 6.9%                                     |                                 |
| Private insurance                                | 26.4%                                      | 26.9%                                    |                                 |
| Other                                            | 8.1%                                       | 7.7%                                     |                                 |
| <b>Geographic region</b>                         |                                            |                                          | <0.001                          |
| Northeast                                        | 2.1%                                       | 23.5%                                    |                                 |
| Midwest                                          | 53.2%                                      | 16.3%                                    |                                 |
| South                                            | 26.0%                                      | 39.1%                                    |                                 |
| West                                             | 18.7%                                      | 21.2%                                    |                                 |
| <b>Location/teaching status of the hospital</b>  |                                            |                                          | <0.001                          |
| Rural                                            | 4.1%                                       | 5.5%                                     |                                 |
| Urban nonteaching                                | 28.1%                                      | 39.0%                                    |                                 |
| Urban teaching                                   | 67.8%                                      | 55.5%                                    |                                 |
| <b>Bed-size of the hospital</b>                  |                                            |                                          | <0.001                          |
| Small                                            | 5.0%                                       | 5.8%                                     |                                 |
| Medium                                           | 14.3%                                      | 22.6%                                    |                                 |
| Large                                            | 80.7%                                      | 71.6%                                    |                                 |
| <b>Elixhauser point-scale index<br/>quartile</b> |                                            |                                          | 0.502                           |
| 1st (<5)                                         | 25.9%                                      | 26.3%                                    |                                 |
| 2nd (5-7)                                        | 24.9%                                      | 26.2%                                    |                                 |
| 3rd (8-14)                                       | 28.1%                                      | 26.8%                                    |                                 |
| 4th (>14)                                        | 21.1%                                      | 20.7%                                    |                                 |
| <b>Endovascular stroke treatment</b>             | 26.5%                                      | 21.0%                                    | <0.001                          |
| <b>Discharge to home/self-care</b>               | 25.6%                                      | 28.2%                                    | 0.016                           |
| <b>Inpatient mortality</b>                       | 12.1%                                      | 11.3%                                    | 0.309                           |
| <b>Intracerebral hemorrhage</b>                  | 5.1%                                       | 4.9%                                     | 0.695                           |
| <b>Gastrointestinal hemorrhage</b>               | 1.5%                                       | 1.3%                                     | 0.362                           |
| <b>Gastrostomy tube placement</b>                | 10.9%                                      | 8.8%                                     | 0.002                           |
| <b>Tracheostomy</b>                              | 0.2%                                       | 0.2%                                     | 0.699                           |

\*States not reporting procedure day for thrombolysis are Illinois 2005-2008 (n=284), Ohio (n=648), Oklahoma (n=210), Utah (n=127), Washington 2005-2007 (n=97), and West Virginia (n=113).
